# Supplementary material for: Antimicrobial Properties of Palladium and Platinum Nanoparticles: A New Tool for Combating Food-Borne Pathogens
Source: MDPI journal article supplement (doi:10.3390/ijms22157892), 2021-07-23

## Supplementary Materials

# Antimicrobial Properties of Palladium and Platinum Nanoparticles: A New Tool for Combating Food-Borne Pathogens

Ondrej Chlumsky<sup>\*1</sup>, Sabina Purkrtova<sup>1</sup>, Hana Michova<sup>1</sup>, Hana Sykorova<sup>1</sup>, Petr Slepicka<sup>2</sup>, Dominik Fajstavr<sup>2</sup>, Pavel Ulbrich<sup>1</sup>, Jitka Viktorova<sup>1</sup> and Katerina Demnerova<sup>1</sup>

<sup>1</sup> Department of Biochemistry and Microbiology, University of Chemistry and Technology, Technická 5, 166 28, Prague 6, Czech Republic

<sup>2</sup> Department of Solid State Engineering, University of Chemistry and Technology, Technická 5, 166 28, Prague 6, Czech Republic

\* Correspondence: chlumsko@vscht.cz

**Table S1.** Absorbance values ( $A_{620}$ ) of the effect of PdNPs on planktonic growth. Data represent the mean of independent experiments ( $n = 2$ ), each with three technical replicates.

| PdNPs     | 22.25<br>mg/L<br>$A_{620}$ | 11.13<br>mg/L<br>$A_{620}$ | 5.6<br>mg/L<br>$A_{620}$ | 2.8<br>mg/L<br>$A_{620}$ | 1.4<br>mg/L<br>$A_{620}$ | 0.7<br>mg/L<br>$A_{620}$ | 0.35<br>mg/L<br>$A_{620}$ | 0.18<br>mg/L<br>$A_{620}$ | 0.09<br>mg/L<br>$A_{620}$ | 0.05<br>mg/L<br>$A_{620}$ | CONTROL |
|-----------|----------------------------|----------------------------|--------------------------|--------------------------|--------------------------|--------------------------|---------------------------|---------------------------|---------------------------|---------------------------|---------|
| SA 816    | 0.2408                     | 0.4382                     | 0.5253                   | 0.5560                   | 0.5743                   | 0.5723                   | 0.5795                    | 0.6152                    | 0.5873                    | 0.5837                    | 0.5938  |
| SA 1241   | 0.1798                     | 0.3377                     | 0.4312                   | 0.4613                   | 0.4850                   | 0.4755                   | 0.4878                    | 0.4882                    | 0.4635                    | 0.4808                    | 0.4922  |
| LM 149    | 0.1265                     | 0.1932                     | 0.2265                   | 0.2520                   | 0.2485                   | 0.2817                   | 0.2692                    | 0.2628                    | 0.2777                    | 0.2557                    | 0.2682  |
| LM 164    | 0.1902                     | 0.2598                     | 0.2682                   | 0.2708                   | 0.2708                   | 0.2815                   | 0.2860                    | 0.2817                    | 0.2687                    | 0.2803                    | 0.2810  |
| EC 683/17 | 0.1005                     | 0.2543                     | 0.3667                   | 0.4453                   | 0.4987                   | 0.5500                   | 0.5660                    | 0.5895                    | 0.6000                    | 0.6095                    | 0.5807  |
| EC 693/17 | 0.0153                     | 0.0923                     | 0.1310                   | 0.1153                   | 0.1540                   | 0.1547                   | 0.1510                    | 0.1557                    | 0.1700                    | 0.1737                    | 0.1823  |
| EC 815    | 0.1977                     | 0.4103                     | 0.4965                   | 0.6088                   | 0.6295                   | 0.7277                   | 0.7350                    | 0.6847                    | 0.7367                    | 0.6832                    | 0.6575  |
| EC 859    | 0.1433                     | 0.2830                     | 0.4078                   | 0.4652                   | 0.5030                   | 0.5278                   | 0.5607                    | 0.5973                    | 0.5870                    | 0.5780                    | 0.5563  |
| SAL 13    | 0.8120                     | 1.1387                     | 1.2795                   | 1.3348                   | 1.3647                   | 1.3860                   | 1.3917                    | 1.3992                    | 1.3898                    | 1.3962                    | 1.4045  |
| SAL 59    | 0.5925                     | 0.8457                     | 0.9958                   | 1.0710                   | 1.0898                   | 1.1157                   | 1.1255                    | 1.1232                    | 1.1315                    | 1.1275                    | 1.1322  |

**Figure S1.** Inhibition effect of PdNPs on planktonic growth. Data represent the mean of independent experiments ( $n = 2$ ), each with three technical replicates.

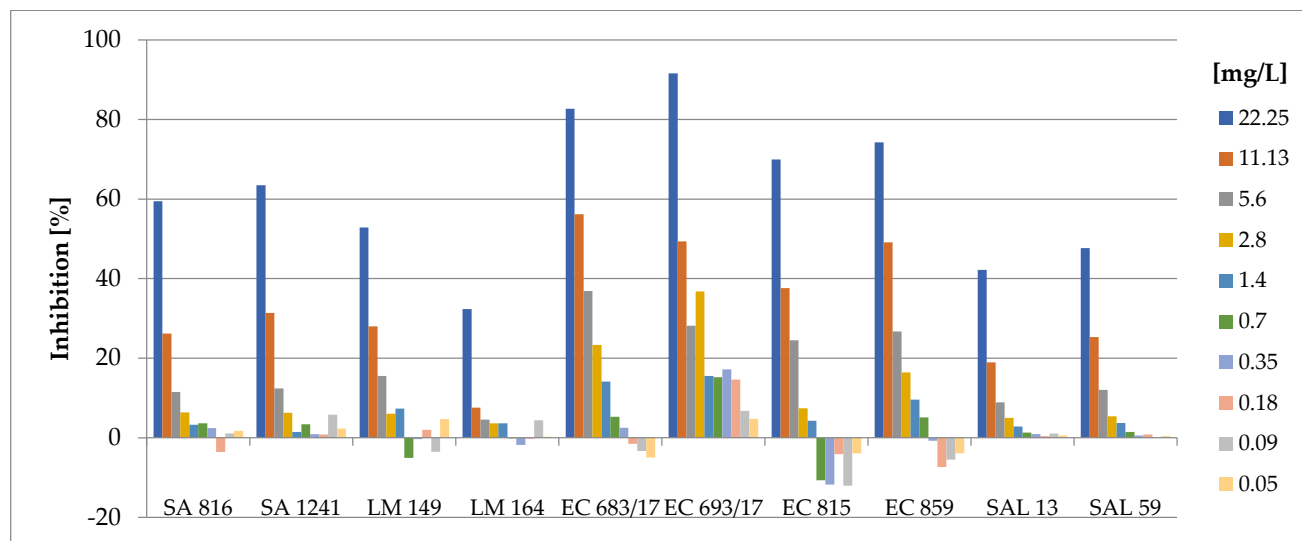

**Figure S2.** Inhibition effect of PdNPs on biofilm formation. Data represent the mean of independent experiments (n = 2), each with three technical replicates.

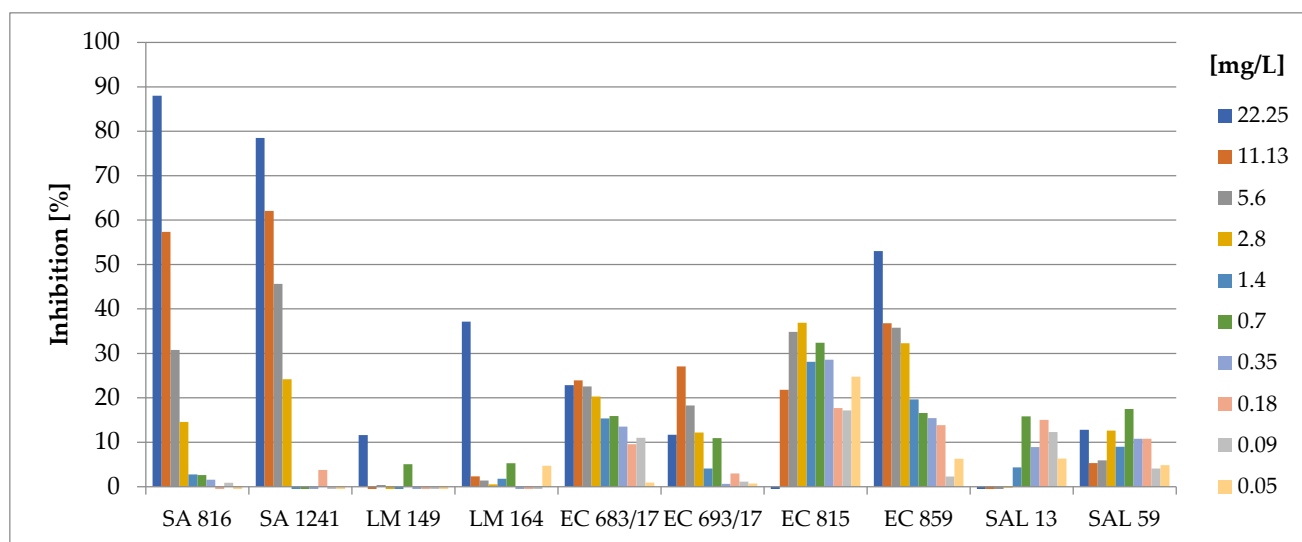

**Figure S3.** Quantification of biofilm formation with the use of 10 different PdNPs concentrations. Red frame marks minimal inhibitory concentrations able to prevent biofilm formation by at least 80 %.

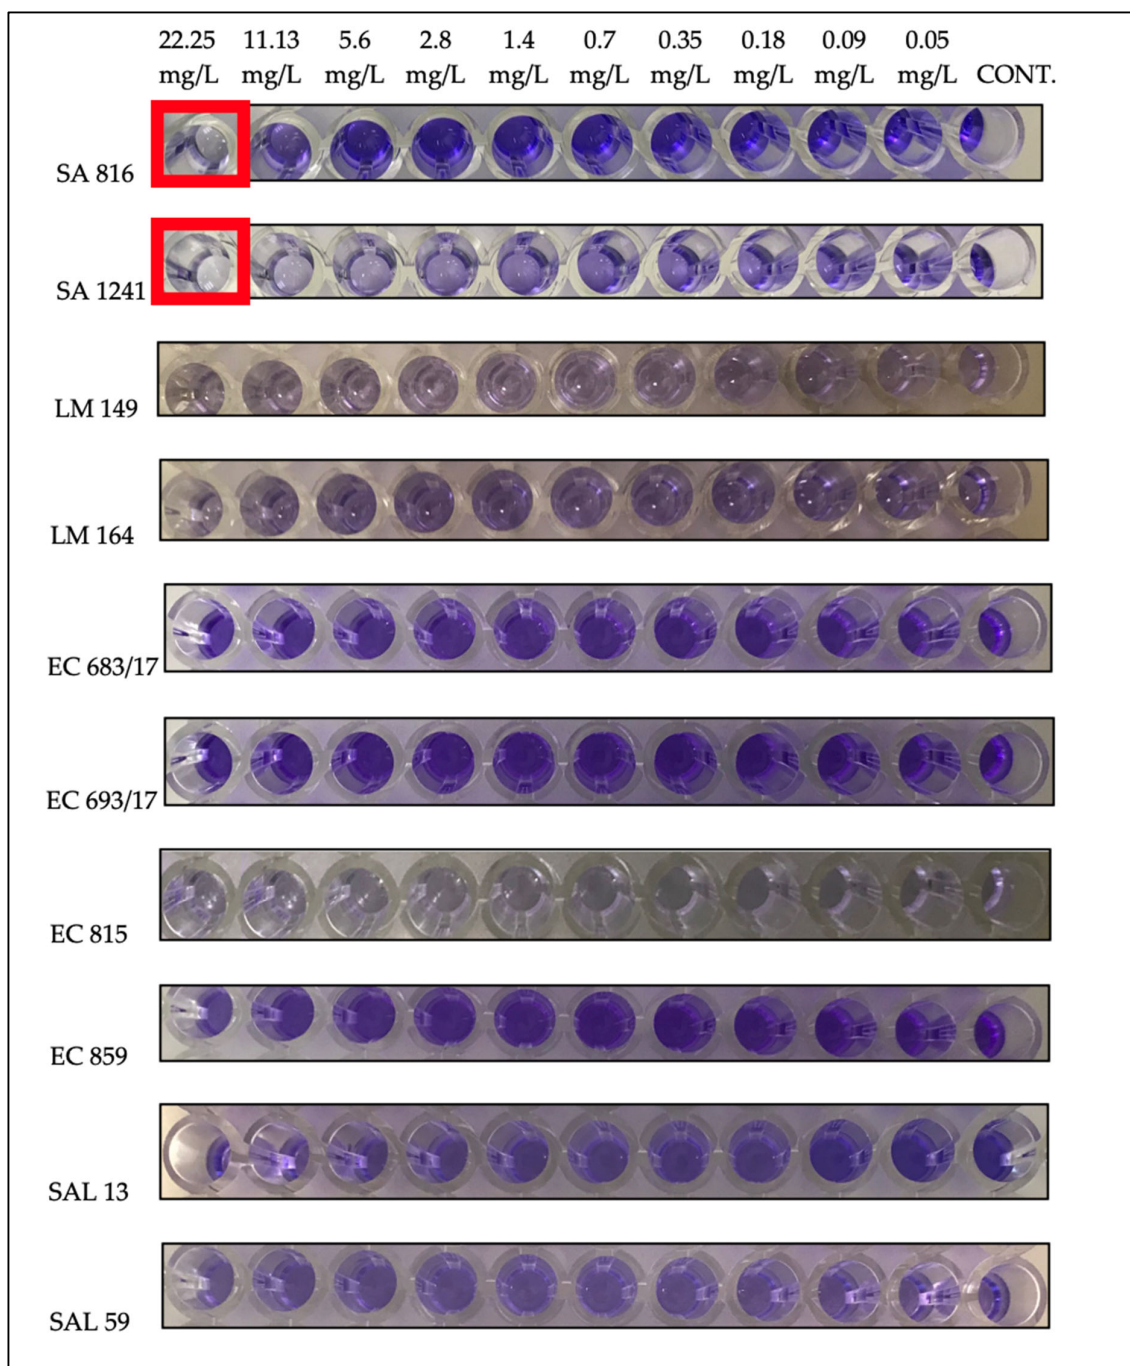

**Table S2.** Absorbance values ( $A_{620}$ ) of the effect of PdNPs on further growth of biofilm cells. Data represent the mean of independent experiments ( $n = 2$ ), each with three technical replicates.

|           | 44.5      | 22.25     | 11.13     | 5.6       | 2.8       | 1.4       |         |
|-----------|-----------|-----------|-----------|-----------|-----------|-----------|---------|
| PdNPs     | mg/L      | mg/L      | mg/L      | mg/L      | mg/L      | mg/L      | CONTROL |
|           | $A_{620}$ | $A_{620}$ | $A_{620}$ | $A_{620}$ | $A_{620}$ | $A_{620}$ |         |
| SA 816    | 0.0117    | 0.1070    | 0.2078    | 0.3467    | 0.2697    | 0.3318    | 0.3303  |
| SA 1241   | 0.0150    | 0.1375    | 0.2520    | 0.3360    | 0.3208    | 0.3620    | 0.3372  |
| LM 149    | 0.0150    | 0.0750    | 0.1093    | 0.1303    | 0.1237    | 0.1253    | 0.1923  |
| LM 164    | 0.0130    | 0.0545    | 0.1173    | 0.1022    | 0.1322    | 0.1093    | 0.1242  |
| EC 683/17 | 0.0233    | 0.0488    | 0.1372    | 0.1903    | 0.2238    | 0.2610    | 0.3850  |
| EC 693/17 | 0.0535    | 0.0618    | 0.1542    | 0.2015    | 0.2492    | 0.2753    | 0.4143  |
| EC 815    | 0.0655    | 0.1115    | 0.3273    | 0.4693    | 0.5113    | 0.5557    | 0.6513  |
| EC 859    | 0.1082    | 0.0215    | 0.1177    | 0.1895    | 0.2068    | 0.2420    | 0.2828  |
| SAL 13    | 0.0432    | 0.7045    | 1.0032    | 1.1412    | 1.2037    | 1.2295    | 1.2903  |
| SAL 59    | 0.0513    | 0.6085    | 0.8298    | 0.9402    | 1.0228    | 0.9882    | 1.0303  |

**Figure S4.** Inhibition effect of PdNPs on further growth of biofilm cells. Data represent the mean of independent experiments ( $n = 2$ ), each with three technical replicates.

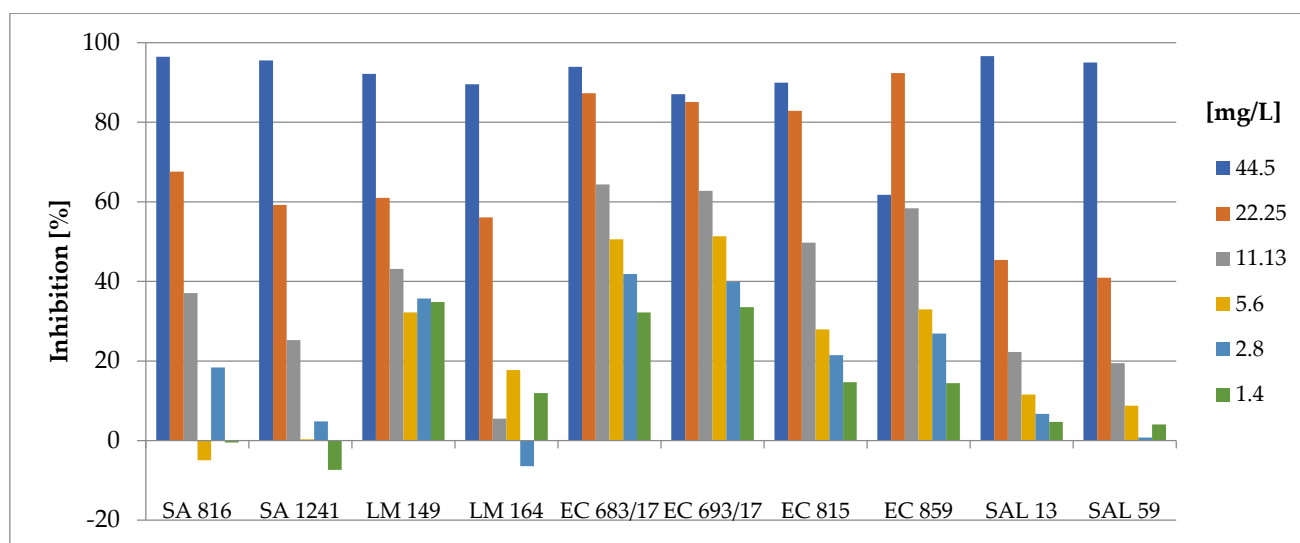

**Figure S5.** Reduction effect of PdNPs on preformed biofilms. Data represent the mean of independent experiments (n = 2), each with three technical replicates.

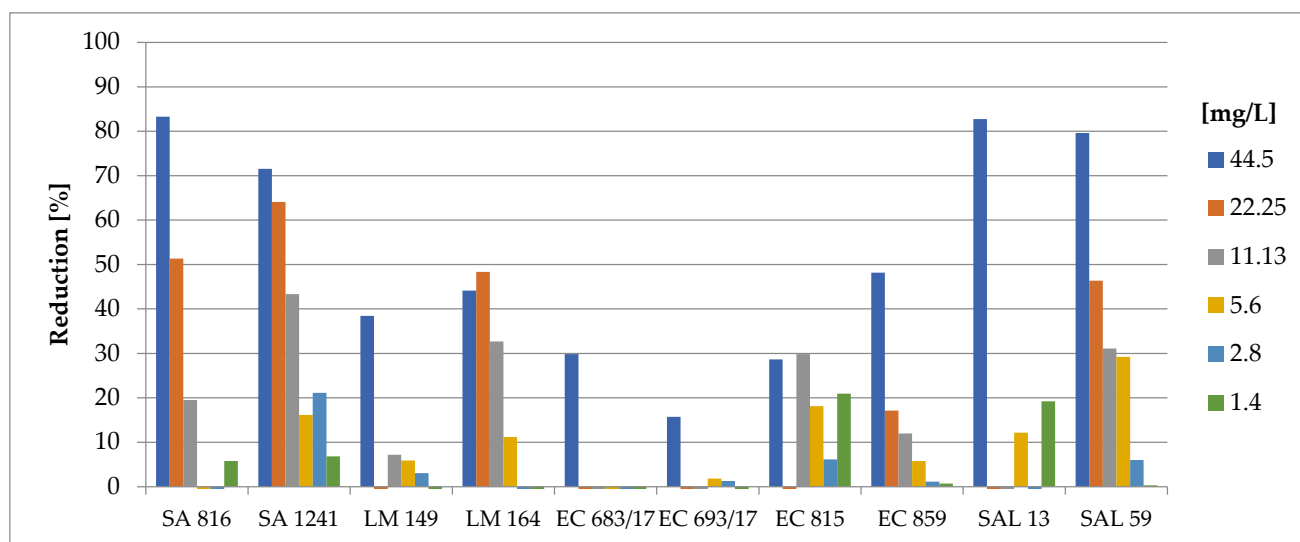

**Figure S6.** Quantification of biofilm reduction with the use of 6 different PdNPs concentrations. Red frame marks minimal inhibitory concentrations able to reduce a preformed biofilm by at least 80 %.

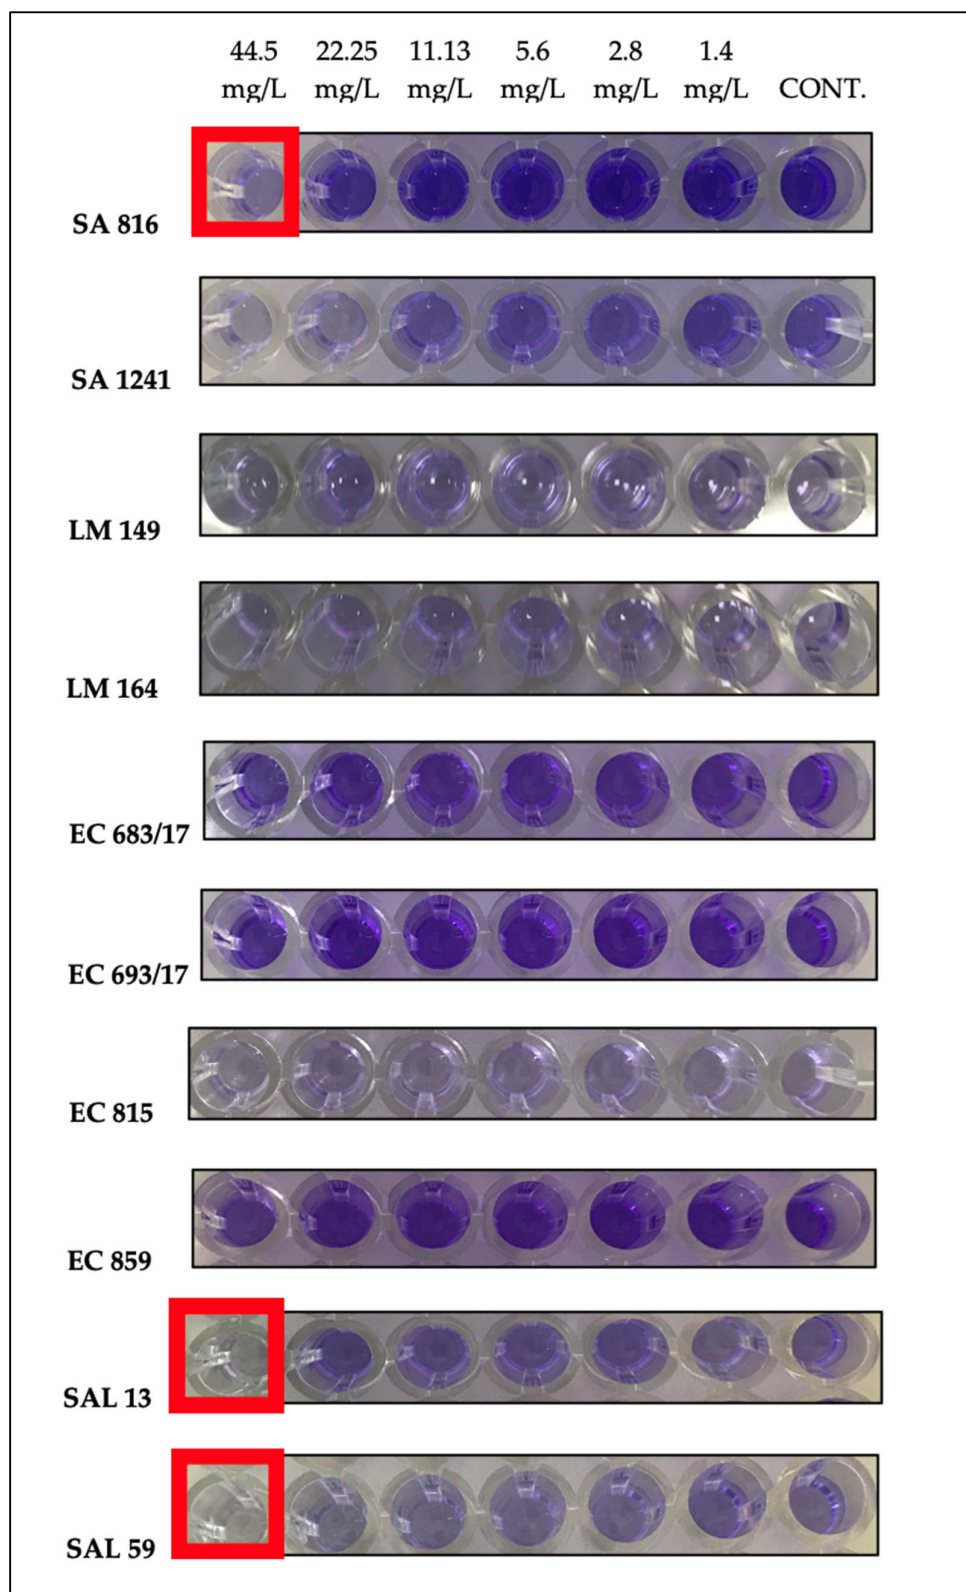

**Table S3.** Absorbance values ( $A_{620}$ ) of the effect of PtNPs on planktonic growth. Data represent the mean of independent experiments ( $n = 2$ ), each with three technical replicates.

| PtNPs     | 50.5<br>mg/L | 25.25<br>mg/L | 12.63<br>mg/L | 6.3<br>mg/L | 3.16<br>mg/L | 1.58<br>mg/L | 0.79<br>mg/L | 0.39<br>mg/L | 0.2<br>mg/L | 0.1<br>mg/L | CONTROL |
|-----------|--------------|---------------|---------------|-------------|--------------|--------------|--------------|--------------|-------------|-------------|---------|
|           | $A_{620}$    | $A_{620}$     | $A_{620}$     | $A_{620}$   | $A_{620}$    | $A_{620}$    | $A_{620}$    | $A_{620}$    | $A_{620}$   | $A_{620}$   |         |
| SA 816    | 0.2450       | 0.4528        | 0.5290        | 0.5690      | 0.5773       | 0.5902       | 0.6005       | 0.5995       | 0.6025      | 0.6113      | 0.5967  |
| SA 1241   | 0.1592       | 0.3180        | 0.4120        | 0.4582      | 0.4475       | 0.4695       | 0.4702       | 0.4910       | 0.4905      | 0.4925      | 0.4003  |
| LM 149    | 0.1248       | 0.1925        | 0.2258        | 0.2405      | 0.2552       | 0.2655       | 0.2590       | 0.2692       | 0.2645      | 0.2692      | 0.2415  |
| LM 164    | 0.1757       | 0.2288        | 0.2505        | 0.2592      | 0.2528       | 0.2688       | 0.2497       | 0.2532       | 0.2455      | 0.2477      | 0.2433  |
| EC 683/17 | 0.1260       | 0.2485        | 0.3513        | 0.4330      | 0.4857       | 0.5250       | 0.5690       | 0.6112       | 0.6012      | 0.6083      | 0.5802  |
| EC 693/17 | 0.1078       | 0.2143        | 0.3057        | 0.3800      | 0.4187       | 0.4505       | 0.4933       | 0.5212       | 0.5357      | 0.5433      | 0.5057  |
| EC 815    | 0.2328       | 0.4895        | 0.5882        | 0.7142      | 0.7003       | 0.7805       | 0.7860       | 0.7668       | 0.8045      | 0.7993      | 0.7520  |
| EC 859    | 0.1462       | 0.2987        | 0.4128        | 0.5042      | 0.5373       | 0.5597       | 0.5675       | 0.5752       | 0.5753      | 0.5773      | 0.5375  |
| SAL 13    | 0.6757       | 0.9488        | 1.1242        | 1.2778      | 1.3187       | 1.3595       | 1.3710       | 1.3745       | 1.3783      | 1.3765      | 1.3735  |
| SAL 59    | 0.5668       | 0.7992        | 0.9937        | 1.1165      | 1.1580       | 1.1835       | 1.1965       | 1.1970       | 1.1988      | 1.1935      | 1.1913  |

**Figure S7.** Inhibition effect of PtNPs on planktonic growth. Data represent the mean of independent experiments ( $n = 2$ ), each with three technical replicates.

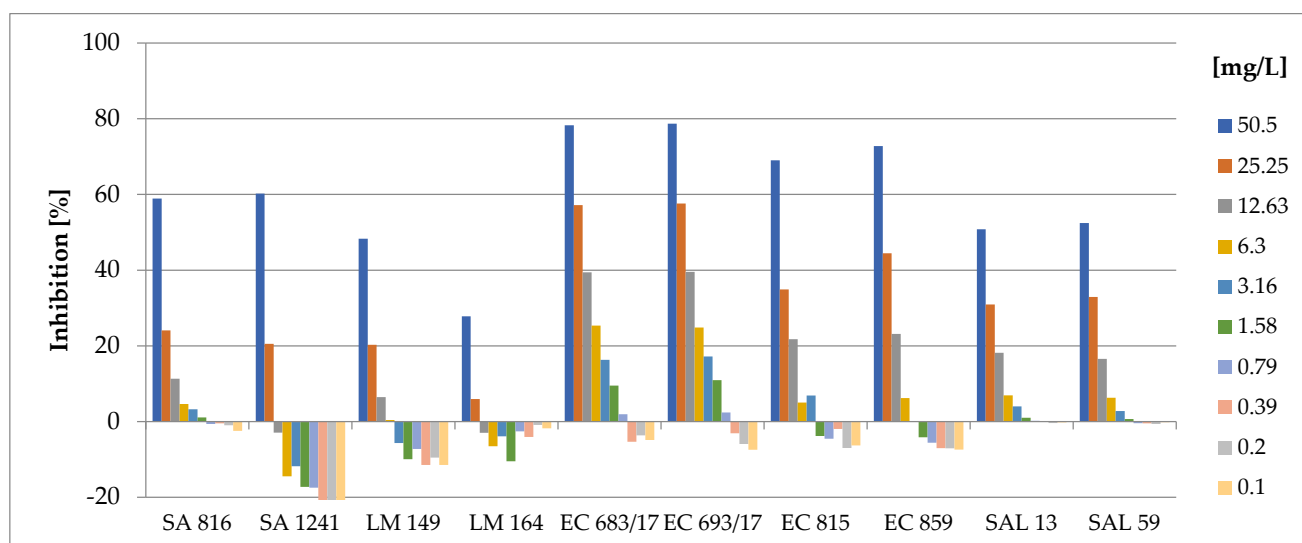



**Figure S8.** Inhibition effect of PtNPs on biofilm formation. Data represent the mean of independent experiments (n = 2), each with three technical replicates.

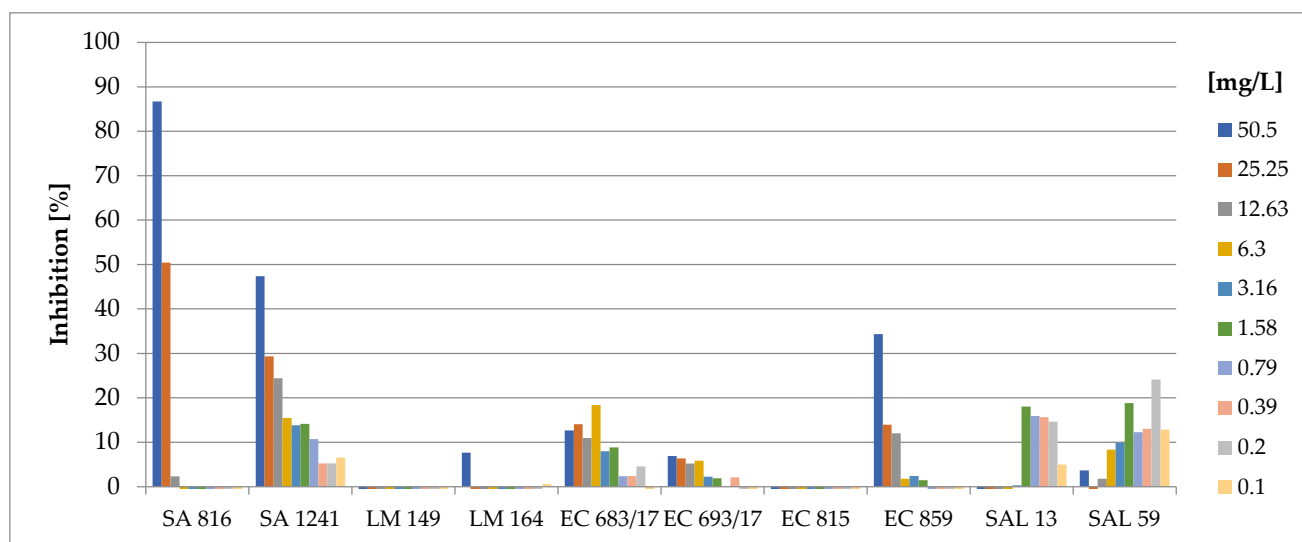

**Figure S9.** Quantification of biofilm formation with the use of 10 different PtNPs concentrations. Red frame marks minimal inhibitory concentrations able to prevent biofilm formation by at least 80 %.

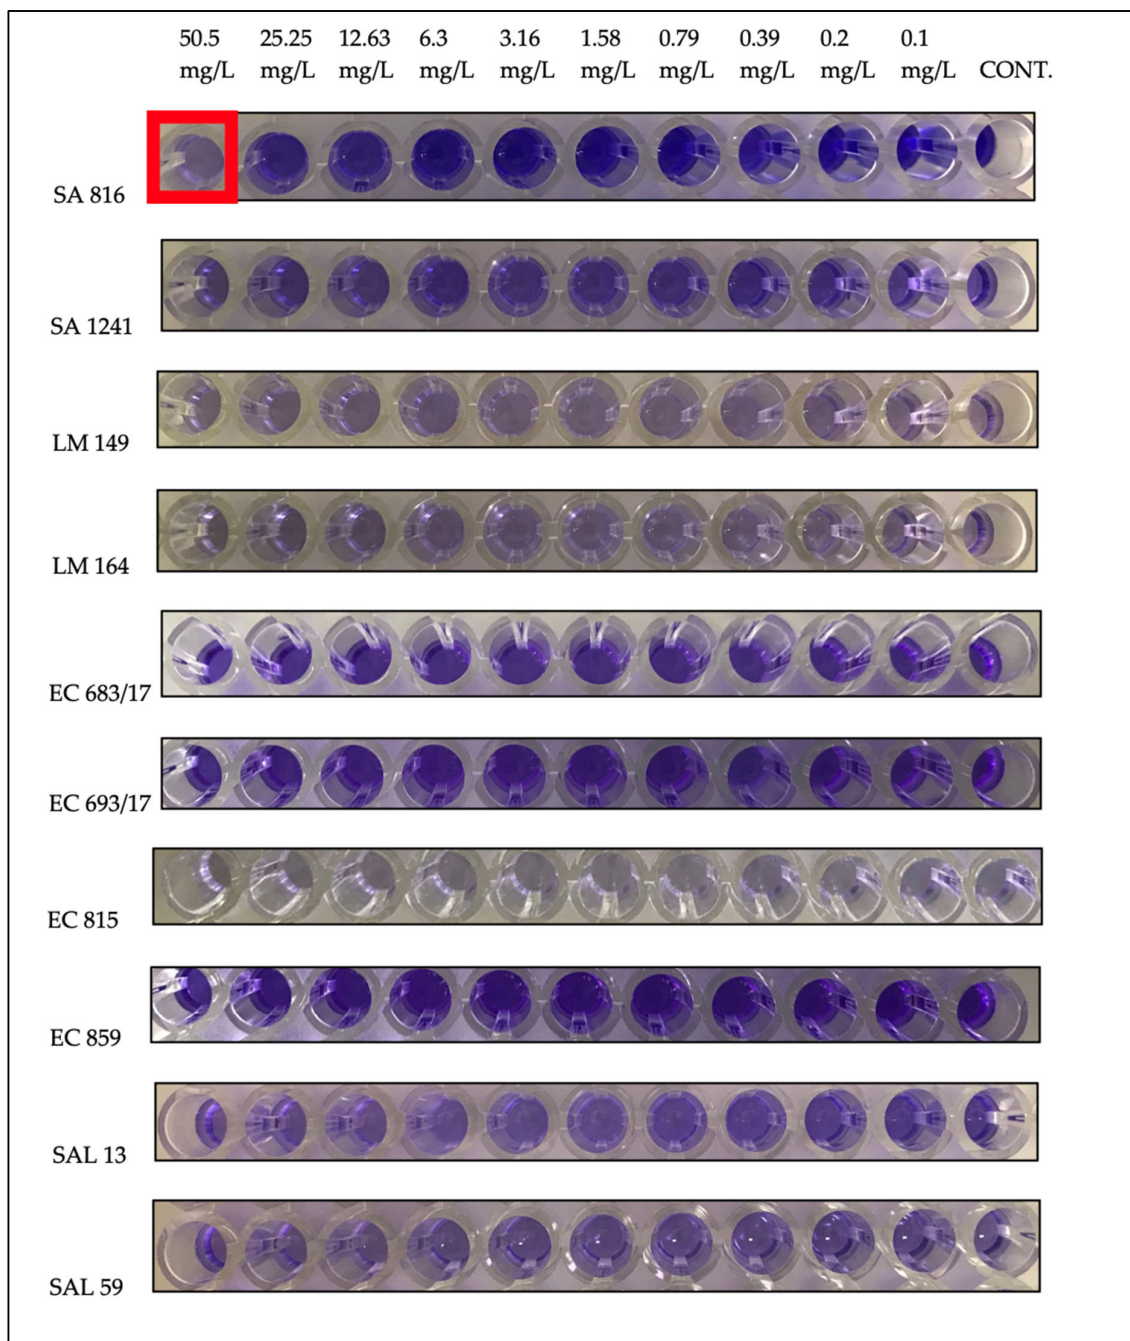

**Table S4.** Absorbance values ( $A_{620}$ ) of the effect of PtNPs on further growth of biofilm cells. Data represent the mean of independent experiments ( $n = 2$ ), each with three technical replicates.

| PtNPs     | 101<br>mg/L<br>$A_{620}$ | 50.5<br>mg/L<br>$A_{620}$ | 25.25<br>mg/L<br>$A_{620}$ | 12.63<br>mg/L<br>$A_{620}$ | 6.3<br>mg/L<br>$A_{620}$ | 3.16<br>mg/L<br>$A_{620}$ | CONTROL |
|-----------|--------------------------|---------------------------|----------------------------|----------------------------|--------------------------|---------------------------|---------|
| SA 816    | 0.0488                   | 0.1282                    | 0.1897                     | 0.2372                     | 0.3027                   | 0.2873                    | 0.3225  |
| SA 1241   | 0.0510                   | 0.1483                    | 0.2075                     | 0.2720                     | 0.3167                   | 0.3072                    | 0.3367  |
| LM 149    | 0.0025                   | 0.0517                    | 0.0665                     | 0.0803                     | 0.0773                   | 0.0792                    | 0.1085  |
| LM 164    | 0.0075                   | 0.0828                    | 0.1448                     | 0.1305                     | 0.1257                   | 0.1077                    | 0.1473  |
| EC 683/17 | 0.0263                   | 0.0798                    | 0.1508                     | 0.2068                     | 0.2552                   | 0.2778                    | 0.4020  |
| EC 693/17 | 0.0260                   | 0.0797                    | 0.1485                     | 0.1962                     | 0.2463                   | 0.2690                    | 0.3900  |
| EC 815    | 0.0292                   | 0.2185                    | 0.3707                     | 0.4668                     | 0.5557                   | 0.5728                    | 0.6502  |
| EC 859    | 0.0405                   | 0.0603                    | 0.1265                     | 0.1678                     | 0.2133                   | 0.2333                    | 0.3082  |
| SAL 13    | 0.0137                   | 0.5822                    | 0.8712                     | 1.0373                     | 1.0858                   | 1.1347                    | 1.1795  |
| SAL 59    | 0.0068                   | 0.4560                    | 0.7332                     | 0.8052                     | 0.9032                   | 0.9120                    | 0.9823  |

**Figure S10.** Inhibition effect of PtNPs on further growth of biofilm cells. Data represent the mean of independent experiments ( $n = 2$ ), each with three technical replicates.

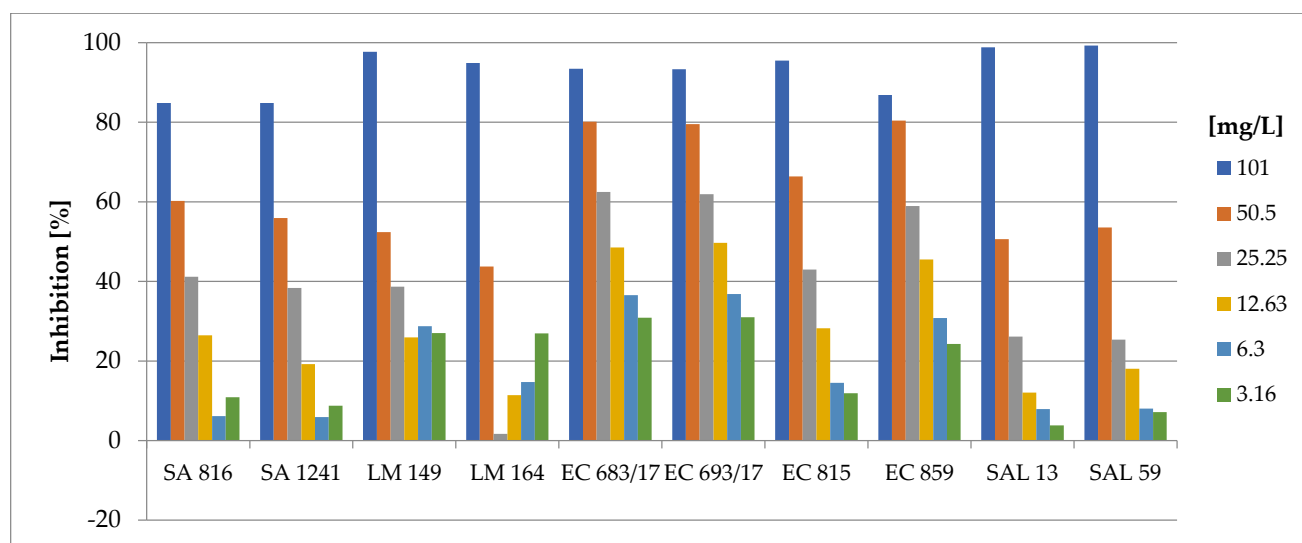

**Figure S11.** Reduction effect of PtNPs on preformed biofilms. Data represent the mean of independent experiments (n = 2), each with three technical replicates.

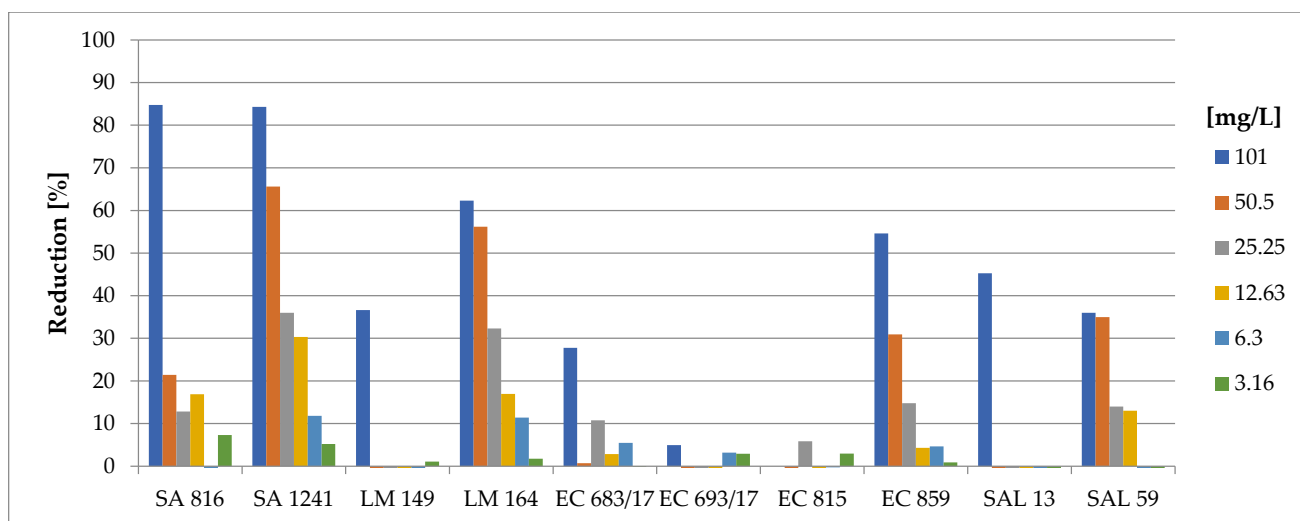

**Figure S12.** Quantification of biofilm reduction with the use of 6 different PtNPs concentrations. Red frame marks minimal inhibitory concentrations reduce a preformed biofilm by at least 80 %.

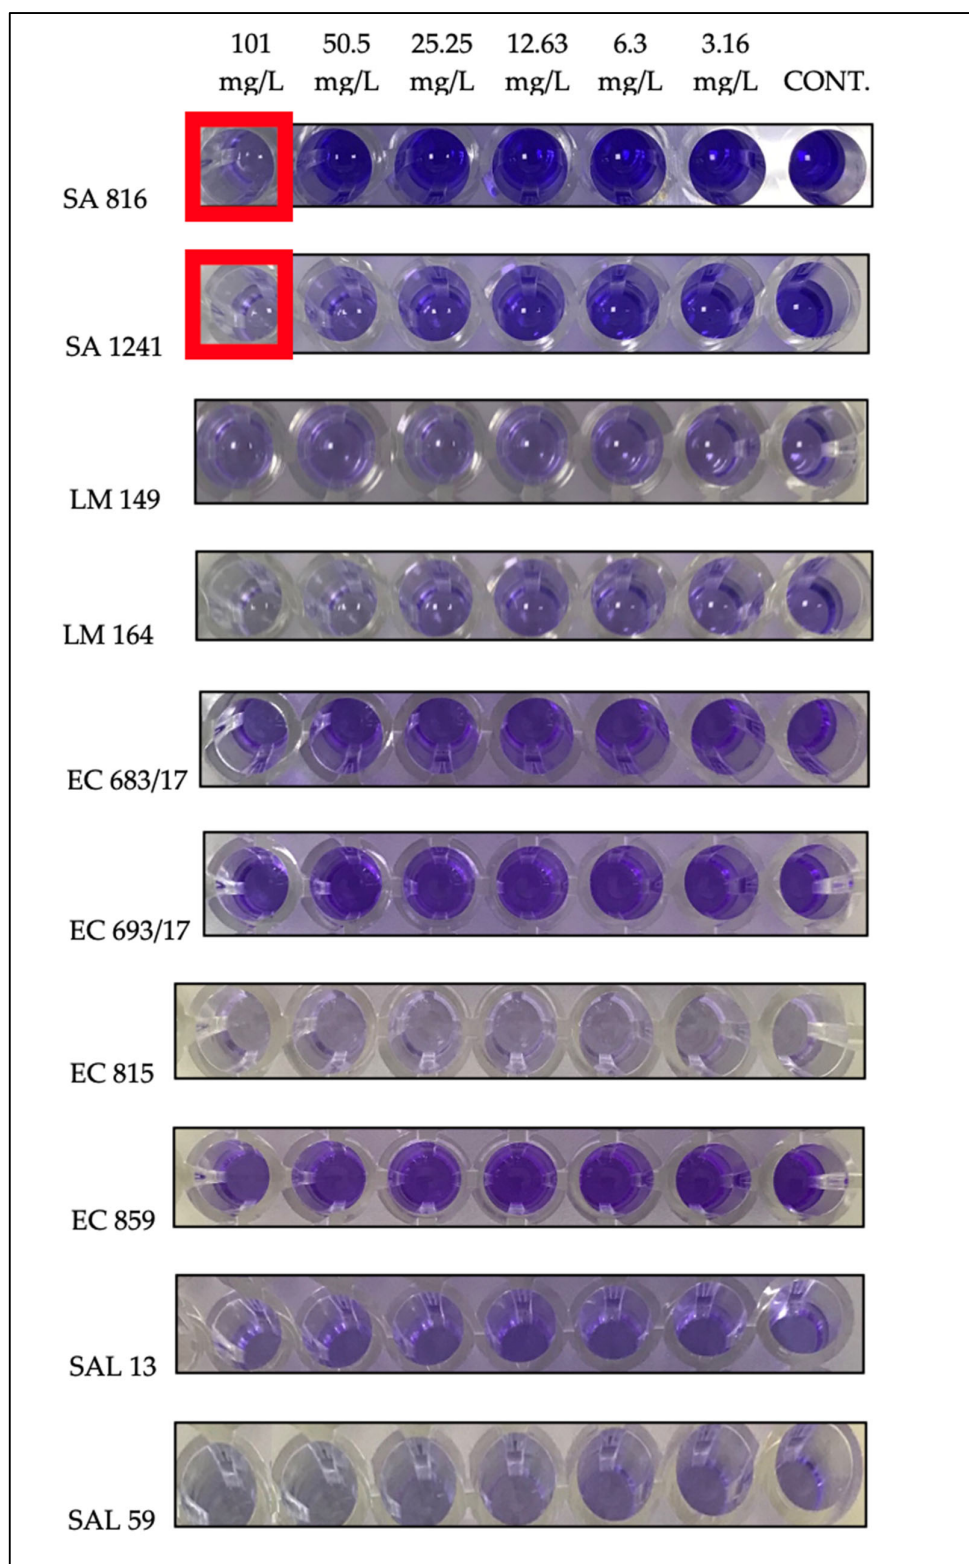

Supplement: s1 [file s1]
